# Supplementary material for: Clinical factors associated with the recovery of cardiovascular autonomic neuropathy in patients with type 2 diabetes mellitus
Source: Springer Nature journal article supplement (doi:10.1186/s12933-019-0830-4), 2019-03-11

A. According to age categories

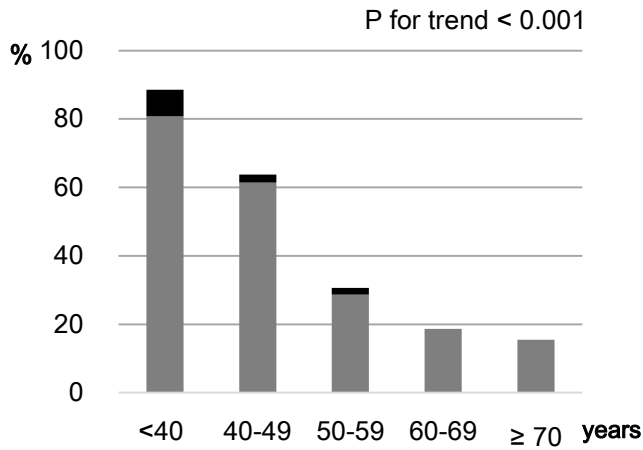

B. According to sex

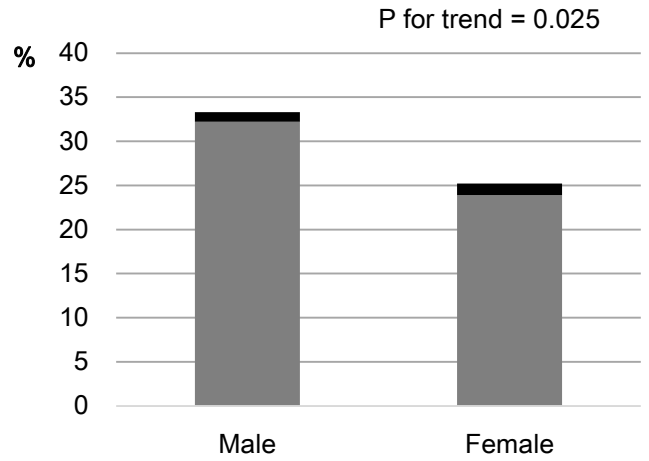

C. According to diabetes duration

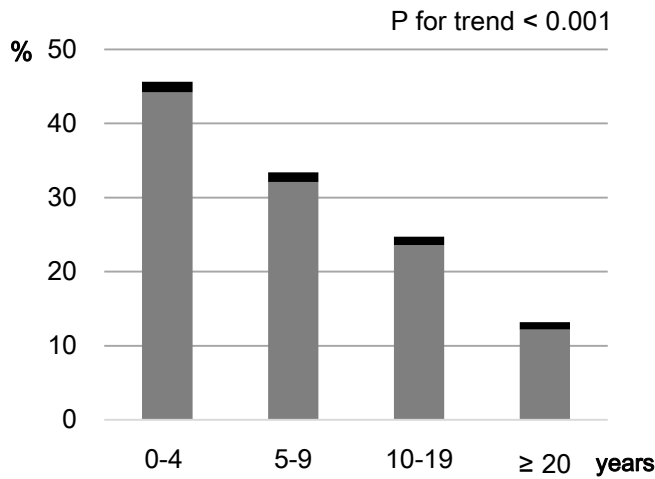

D. According to body weight change over 2-3 years

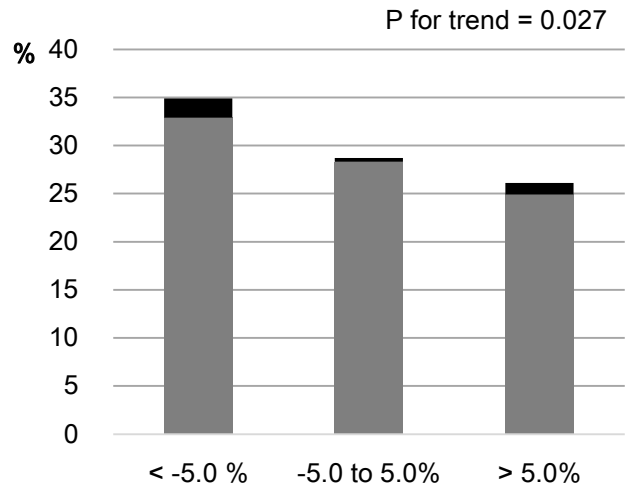

E. According to change in HbA1c level

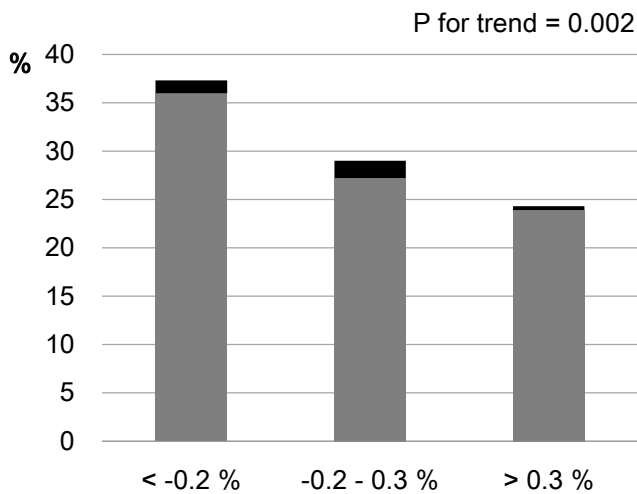

F. Degree of albuminuria

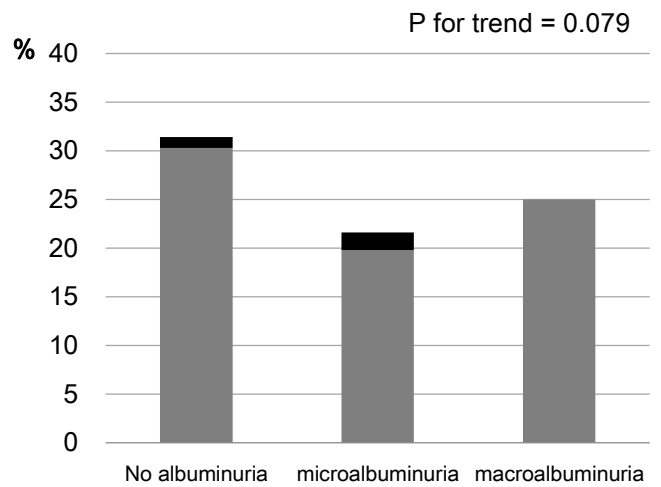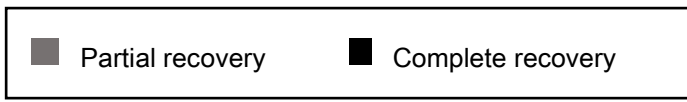

Supplement: MOESM2 [file 16538444]
